# Supplementary material
Source: Copernicus journal article supplement (doi:10.5194/egusphere-2026-1577)
Supplement: Supplementary file 1 [file egusphere-2026-1577-supplement.pdf]

1 *Supplement of*

2 Molecular dynamics study on the liquid-liquid contact  
3 angle in liquid-liquid phase separated aerosols

4

5 Chao Zhang et al.

6 Correspondence to: Yang Yang ([yangyang@usst.edu.cn](mailto:yangyang@usst.edu.cn))

7

8 **1. Simulation details**

9 All molecular dynamics simulations in this study were conducted using LAMMPS  
10 (Plimpton, 1995). The droplet compositions were dodecane + water, dodecane + water  
11 + sodium chloride (NaCl), and dodecane + water + suberic acid, respectively. In the  
12 Martini force field, a dodecane molecule was mapped to standard C1 beads, with each  
13 C1 bead containing four carbon atoms (Fig. S1). Water molecules were mapped to  
14 uncharged P4 beads in the Martini force field, with each bead containing four water  
15 molecules. A special "anti-freezing" bead (BP4) was introduced to prevent water from  
16 freezing at around 300 K. Sodium and chloride ions were represented by  $Q_a$  and  $Q_d$   
17 beads, respectively. In the OPLS-UA force field, each  $-CH_3$  and  $-CH_2$  group was  
18 represented by a single particle, and water molecules were modeled using the SPC/E  
19 model (Berendsen et al., 1987), which can be adopted to accurately predict key  
20 physicochemical properties of water, especially its density and surface tension (Zhang  
21 et al., 2025; Zhang et al., 2024). The SPC/E model is suitable for various water-based

22 simulations and is widely used in the study of water phase transition simulations and  
 23 water cluster microstructures (Li and Bourg, 2023). NaCl was parameterized using  
 24 parameters developed by Dang (1995).

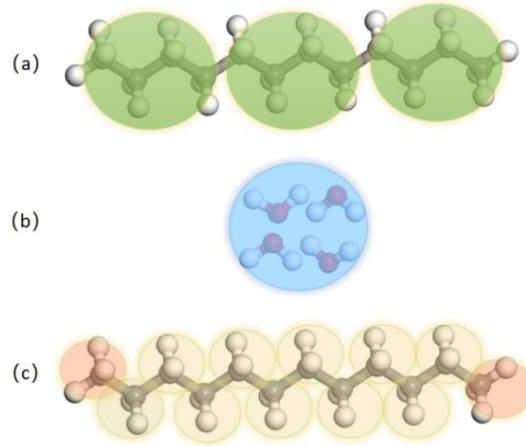

25  
 26 Fig. S1 Mapping schemes of Martini force field and united atom force field: (a) Martini model of  
 27 dodecane using 1-4 mapping scheme; (b) Martini model of water using 1-4 mapping scheme; (c)  
 28 UA model of dodecane with groups represented by single particles

29 The interaction forces between different beads in the Martini force field are  
 30 expressed as follows:

$$\begin{aligned}
 U_{\text{tot}} = & \sum_{\text{nonbond}} \left[ 4 \epsilon_{ij} \left( \frac{\sigma_{ij}^{12}}{r_{ij}^{12}} - \frac{\sigma_{ij}^6}{r_{ij}^6} \right) + \frac{q_i q_j}{r_{ij}} \right] \\
 & + \sum_{\text{bond}} \frac{1}{2} K_{\text{bond}} (R - R_{\text{bond}})^2 + \sum_{\text{angle}} \frac{1}{2} K_{\text{angle}} [\cos(\theta) - \cos(\theta_0)]^2
 \end{aligned} \quad (1)$$

31  
 32 where the three terms on the right side of the equal sign are energies of non-bonding  
 33 interactions including Lennard-Jones term and the Coulomb term, bond stretching,  
 34 angle bending,  $\epsilon_{ij}$  is the energy parameter of the interaction,  $\sigma_{ij}$  is the Lennard-Jones  
 35 core diameter,  $r$  is the distance between two beads ( $i$  and  $j$ ), and  $q$  is the charge of the  
 36 bead,  $R$ ,  $R_{\text{bond}}$  and  $K_{\text{bond}}$  are the distance between two beads, the equilibrium distance  
 37 between these two beads, and the bond potential energy constant, and  $\theta$  and  $K_{\text{angle}}$  are

38 the bond angle and the angular potential energy constant. Parameters of the Martini  
 39 force field are listed in Table S1-S3.

40 In the OPLS-UA force field, the interaction between different particles is  
 41 expressed as:

$$\begin{aligned}
 U_{tot} = \sum_{nonbond} & \left[ 4 \varepsilon_{ij} \left( \frac{\sigma_{ij}^{12}}{r_{ij}^{12}} - \frac{\sigma_{ij}^6}{r_{ij}^6} \right) + \frac{q_i q_j}{r_{ij}} \right] f_{ij} + \sum_{bond} K_b (b - b_0)^2 + \sum_{angle} K_\theta (\theta - \theta_0) \\
 & + \sum_{torsion} \left\{ \frac{V_1}{2} [1 + \cos(\phi)] + \frac{V_2}{2} [1 - \cos(2\phi)] + \frac{V_3}{2} [1 + \cos(3\phi)] + \frac{V_4}{2} [1 - \cos(4\phi)] \right\}
 \end{aligned} \quad (2)$$

43 where the four terms on the right side of the equation are the energies of non-bonding  
 44 interactions, bond stretching, angle bending and torsion, respectively. The non-bonding  
 45 interaction term consists of the Lennard-Jones term and the Coulomb term, which are  
 46 used for the non-bonding interactions between atoms in different molecules and within  
 47 a molecule where the two atoms are separated by three or more bonds ( $f_{ij} = 0.5$ ) or more  
 48 ( $f_{ij} = 1.0$ ).  $V_i$  is the Fourier coefficient and  $\phi$  is the dihedral angle. Parameters of the  
 49 OPLS-UA force field are listed in Table S4-S7.

50 In the simulations based on the Martini force field, non-bonded interactions were  
 51 truncated at a distance of  $r_c = 1.2$  nm. Moltemplate was used to establish the initial  
 52 droplet models. In the united-atom OPLS-UA force field simulations, the LJ interaction  
 53 cutoff distance was set to 1.4 nm, and the PPPM method was used to calculate the long-  
 54 range Coulombic interactions. The interactions between different atoms in the force  
 55 field were calculated using the Lorentz-Berthelot (LB) combination rule 41, where  $\varepsilon_{ij} =$   
 56  $(\varepsilon_i \varepsilon_j)^{1/2}$  and  $\sigma_{ij} = (\sigma_i + \sigma_j)/2$ . The time step was set to 5 fs, and the SHAKE algorithm was  
 57 used to fix the bond angles and bond lengths of SPC/E water. The simulation process  
 58 adopted the NVT ensemble, and the temperature was controlled by the Nose-Hoover

59 thermostat. In simulations based on the Martini force field, the system temperatures  
60 were controlled to 240 K, 260 K, 280 K, 300 K, and 320 K, respectively, with a time  
61 step of 20 fs. In simulations based on the OPLS-UA force field, the simulation  
62 temperatures were 280 K, 290 K, 300 K, 310 K, and 320 K, respectively. The system  
63 with a temperature below 280 K is not simulated because at low temperatures irregular  
64 dodecane cluster shapes can lead to significant deviations in the contact angle  
65 calculation. At the initial simulation moment, all systems were energy minimized using  
66 the steepest descent method to eliminate any close contacts between particles or beads.  
67 The equilibrium state of the system was determined by tracking the changes in system  
68 energy. After reaching equilibrium, the positions of all atoms were statistically recorded  
69 every 2 ps for a total of 3 ns.

70 Table S1. Parameter values for the non-bond interaction in the Martini force field

|                | $\sigma(\text{\AA})$ | $\epsilon(\text{kcal/mol})$ | $q(\text{e})$ |
|----------------|----------------------|-----------------------------|---------------|
| C1             | 4.7                  | 0.836521                    | 0             |
| P4             | 4.7                  | 1.195030                    | 0             |
| BP4            | 4.7                  | 1.195030                    | 0             |
| Q <sub>a</sub> | 4.7                  | 1.195030                    | -1            |
| Q <sub>d</sub> | 4.7                  | 1.195030                    | 1             |

71

72 Table S2. Parameter values for the bond-stretching interaction in the Martini force field

|       | $K_{\text{bond}}(\text{kcal/mol}\cdot\text{\AA}^2)$ | $R_{\text{bond}}(\text{\AA})$ |
|-------|-----------------------------------------------------|-------------------------------|
| C1-C1 | 1.493787                                            | 4.7                           |

73

74 Table S3. Parameter values for the bond angle bending interactions in the Martini force field

|          | $K_{\text{angle}}(\text{kcal/mol}\cdot\text{\AA}^2)$ | $\theta_0(^{\circ})$ |
|----------|------------------------------------------------------|----------------------|
| C1-C1-C1 | 2.987575                                             | 180                  |

75

76 Table S4. Parameter values for the non-bond interaction in the OPLS-UA force field

|                  | $\sigma(\text{\AA})$ | $\varepsilon(\text{kcal/mol})$ | $q(\text{e})$ |
|------------------|----------------------|--------------------------------|---------------|
| -CH <sub>3</sub> | 3.905                | 0.175                          | 0             |
| -CH <sub>2</sub> | 3.905                | 0.118                          | 0             |
| -C               | 3.75                 | 0.105                          | 0.55          |
| -O               | 3                    | 0.17                           | -0.58         |
| =O               | 2.96                 | 0.21                           | -0.5          |
| -H               | 0                    | 0                              | 0.45          |
| -CH <sub>2</sub> | 3.905                | 0.118                          | 0.08          |
| -CH <sub>2</sub> | 3.905                | 0.118                          | 0             |

|     |       |        |         |
|-----|-------|--------|---------|
| -Cl | 4.401 | 0.0999 | -1      |
| -Na | 2.584 | 0.0999 | 1       |
| -H  | 0     | 0      | 0.4238  |
| -O  | 3.166 | 0.1553 | -0.8476 |

77

78 Table S5. Parameter values for the bond-stretching interaction in the OPLS-UA force  
79 field

|                                  | $K_b(\text{kcal/mol}\cdot\text{\AA}^2)$ | $R_b(\text{\AA})$ |
|----------------------------------|-----------------------------------------|-------------------|
| CH <sub>3</sub> -CH <sub>2</sub> | 260                                     | 1.526             |
| CH <sub>2</sub> -CH <sub>2</sub> | 260                                     | 1.526             |
| C-O                              | 450                                     | 1.364             |
| C=O                              | 570                                     | 1.214             |
| C-CH <sub>2</sub>                | 317                                     | 1.52              |
| H-O                              | 553                                     | 0.97              |
| H-O                              | 450                                     | 1.0               |

80

81 Table S6. Parameter values for the bond angle bending in the OPLS-UA force field

|                                                   | $K_{\theta}(\text{kcal/mol}\cdot\text{\AA}^2)$ | $\theta_0(^{\circ})$ |
|---------------------------------------------------|------------------------------------------------|----------------------|
| CH <sub>3</sub> -CH <sub>2</sub> -CH <sub>2</sub> | 63                                             | 112.4                |
| CH <sub>2</sub> -CH <sub>2</sub> -CH <sub>2</sub> | 63                                             | 112.4                |
| O-C=O                                             | 80                                             | 123                  |
| O-C-CH <sub>2</sub>                               | 70                                             | 111                  |
| O=C-CH <sub>2</sub>                               | 80                                             | 126                  |
| C-O-H                                             | 35                                             | 107                  |
| C-CH <sub>2</sub> -CH <sub>2</sub>                | 63                                             | 112.4                |
| H-O-H                                             | 55                                             | 109.47               |

82

83 Table S7. Parameter values for the torsional (dihedral angles) interactions in the

84 OPLS-UA force field

|                                                                    | $V_1$ | $V_2$ | $V_3$ | $V_4$ |
|--------------------------------------------------------------------|-------|-------|-------|-------|
| CH <sub>3</sub> -CH <sub>2</sub> -CH <sub>2</sub> -CH <sub>2</sub> | -3.4  | 1.25  | 3.1   | 0     |
| CH <sub>2</sub> -CH <sub>2</sub> -CH <sub>2</sub> -CH <sub>2</sub> | -3.4  | 1.25  | 3.1   | 0     |
| CH <sub>2</sub> -CH <sub>2</sub> -C-O                              | 0     | 1.412 | 0     | 0     |
| CH <sub>2</sub> -CH <sub>2</sub> -C=O                              | 0     | 0     | 0     | 0     |

CH<sub>2</sub>-CH<sub>2</sub>-CH<sub>2</sub>-C                      -2.06                      -0.313                      0.315                      0

85

86 2. Results and Discussion

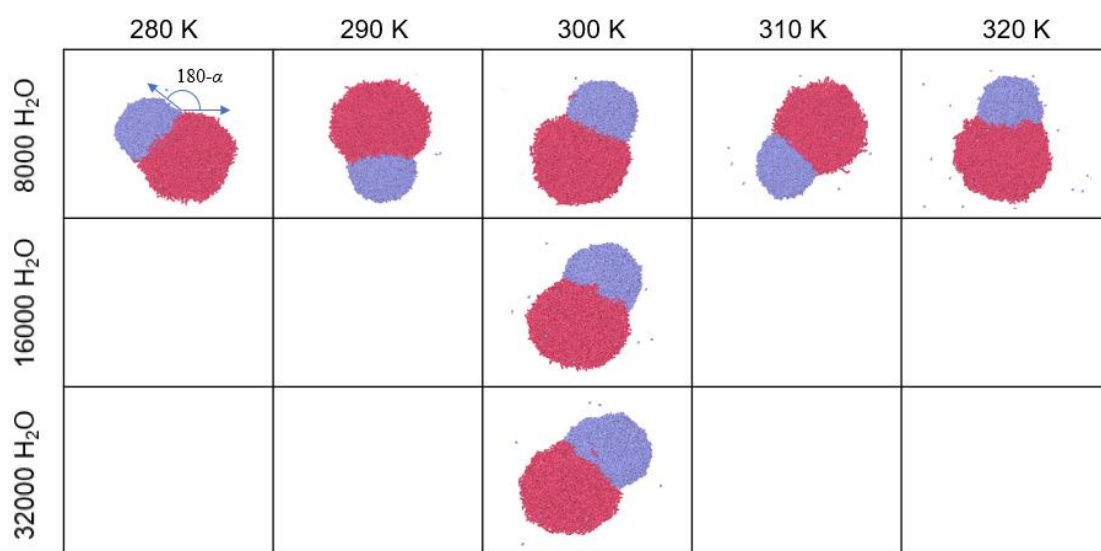

87

88 Fig. S2 Snapshots of water-dodecane droplets under different temperatures and water contents  
 89 (MD simulations with OPLS-UA field) , dodecane and water molecules are represented by red  
 90 and blue balls, respectively

91

92 Table S8. Fitting parameters in equation (9) for all systems

| Case                        | $a_1$              | $a_2$               | $a_3$  | $a_4$                | $a_5$                  |
|-----------------------------|--------------------|---------------------|--------|----------------------|------------------------|
| water-dodecane<br>(Martini) | $5.82 \times 10^3$ | $8.36 \times 10^1$  | -0.448 | $0.1 \times 10^{-2}$ | $-9.42 \times 10^{-7}$ |
| water-dodecane<br>(OPLS-UA) | $7.19 \times 10^3$ | $-9.64 \times 10^2$ | 4.843  | -0.011               | $9.02 \times 10^{-7}$  |

|               |                     |                     |                     |                        |                        |
|---------------|---------------------|---------------------|---------------------|------------------------|------------------------|
| water-        |                     |                     |                     |                        |                        |
| dodecane-NaCl | $-3.92 \times 10^3$ | $5.83 \times 10^1$  | -0.324              | $7.95 \times 10^{-4}$  | $-7.28 \times 10^{-7}$ |
| (Martini)     |                     |                     |                     |                        |                        |
| water-        |                     |                     |                     |                        |                        |
| dodecane-NaCl | $1.49 \times 10^5$  | $-1.99 \times 10^3$ | 9.982               | $-0.22 \times 10^{-1}$ | $1.85 \times 10^{-5}$  |
| (OPLS-UA)     |                     |                     |                     |                        |                        |
| water-        |                     |                     |                     |                        |                        |
| dodecane-     |                     |                     |                     |                        |                        |
| suberic acid  | $-7.53 \times 10^6$ | $9.96 \times 10^4$  | $-4.94 \times 10^2$ | 1.087                  | $-8.98 \times 10^{-4}$ |
| (OPLS-UA)     |                     |                     |                     |                        |                        |

---

93

94 **References**

95 Berendsen, H. J., Grigera, J.-R., and Straatsma, T. P.: The missing term in effective pair  
 96 potentials, *J. Phys. Chem.*, 91, 6269-6271, 1987.

97 Dang, L. X.: Mechanism and thermodynamics of ion selectivity in aqueous solutions  
 98 of 18-crown-6 ether: a molecular dynamics study, *J. Am. Chem. Soc.*, 117, 6954-6960,  
 99 1995.

100 Li, X. and Bourg, I. C.: Microphysics of liquid water in sub-10 nm ultrafine aerosol  
 101 particles, *Atmos. Chem. Phys.*, 23, 2525-2556, 2023.

102 Plimpton, S.: Fast parallel algorithms for short-range molecular dynamics, *J. Comput.*  
 103 *Phys.*, 117, 1-19, 1995.

104 Zhang, C., Yu, D., Ma, N., and Wang, Y. J. P. T.: Effect of size and concentration

105 corrections for surface tension on the hygroscopicity prediction of nano-aerosols, 433,

106 119278, 2024.

107 Zhang, C., Lin, H., Zhang, Z., Yang, Y., Pan, J., Wang, Y., and Wiedensohler, A. J. P. o.

108 F.: Quantitative description of surface tension for nanodroplets containing ammonium

109 sulfate and its application to the particle hygroscopicity prediction, 37, 2025.

110

111
